# Supplementary material for: Emotion, Fact, and Anthropogenic Disturbances: Undergraduate Attitudes Toward Wildfire and Urbanization after a Brief Intervention
Source: Atypon-hosted journal article supplement (doi:10.1187/cbe.22-08-0152), 2024-01-02
Supplement: combinedsupmats.pdf [file combinedsupmats.pdf]

# Supplemental Material

*CBE—Life Sciences Education*

Hubert *et al.*

1 **Supplemental Material**

2

3 **Emotion, fact, and anthropogenic disturbances: Undergraduate attitudes toward wildfire**  
4 **and urbanization after a brief intervention**

5 Mali M. Hubert<sup>1,2,4</sup>, Maryrose Weatherton<sup>1,3</sup>, and Elisabeth Schussler<sup>1</sup>

6 *CBE Life Sciences Education*

7

8 1. Dept. of Ecology and Evolutionary Biology, University of Tennessee, Knoxville TN 37996

9 2. Dept. of Natural Sciences, Tennessee Wesleyan University, Athens TN 37303

10 3. Dept. of Theory and Practice in Teacher Education, University of Tennessee, Knoxville TN  
11 37996

12 4. Corresponding Author: mhubert@tnwesleyan.edu, (423) 746-5235

13 ORCID #- 0000-0001-5263-6877

14

15

16

17

18

19

20

21

22

23

24

25

26

27 **Table S1. WUAS- Pre- and Post-Intervention Wildfire and Urbanization Attitude Survey 2020-**  
28 **2021**

29  
30 Are you age 18 or above?  
31 What is your name?  
32 What month were you born? (*only for intervention and post-survey*)  
33 What class(es) are you currently enrolled? Check your class(es).

34  
35 **Wildfire Section**

36 Please respond to the following statements on a 5-point scale where 1 = strongly disagree and 5  
37 = strongly agree.

- 38 1) I believe our climate is changing.
  - 39 2) I believe that wildfire frequency is increasing.
  - 40 3) I am concerned about wildfires.
  - 41 4) I believe that there is evidence of an increase in global wildfire occurrence.
  - 42 5) Wildfires will impact future generations.
  - 43 6) Wildfires will impact our environment in the next 10 years.
  - 44 7) The actions of individuals can make a positive difference to reduce wildfires.
  - 45 8) Wildfires have a negative effect on our lives.
  - 46 9) We cannot do anything to stop wildfires.
- 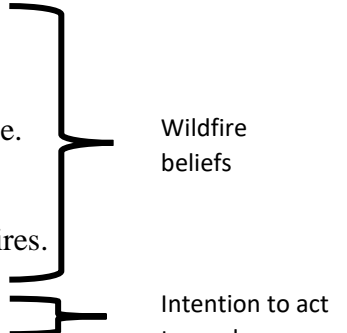

47  
48 (*Open-ended question*)  
49 Why do you feel the way you do about wildfires?  
50 Have you ever been personally impacted by a wildfire?

51  
52 **Urbanization Section**

53 *Urbanization is the process in which there is an increase in the number of people living and*  
54 *working in a city or metropolitan area (National Geographic).*

55 Please respond to the following statements on a 5-point scale where 1 = strongly disagree and 5  
56 = strongly agree.

- 57 10) I believe that urbanization is occurring.
  - 58 11) I am concerned about urbanization.
  - 59 12) I believe that there is evidence of an increase in global urbanization.
  - 60 13) Urbanization will impact future generations.
  - 61 14) Urbanization will impact our environment in the next 10 years.
  - 62 15) The actions of individuals can reduce the impacts of urbanization.
  - 63 16) Urbanization has a negative effect on our lives.
  - 64 17) We cannot do anything to stop urbanization.
- 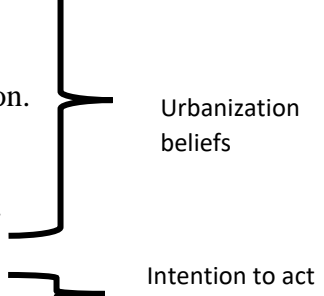

65  
66 (*Open-ended question*)  
67 Why do you feel the way you do about urbanization?  
68 Do you live in an urbanized area?

69  
70  
71

72 **General Environmental Questions**

73 Please respond to the following statements on a 5-point scale where 1 = strongly disagree and 5  
74 = strongly agree.

75 18) I can do my part to make the world a better place for future generations.

76 19) Knowing about environmental problems and issues is important to me.

77 20) I think most of the concerns about environmental problems have been  
78 exaggerated.

79 21) It is a waste of time to work to solve environmental problems.

80 22) There is not much I can do that will help solve environmental problems.

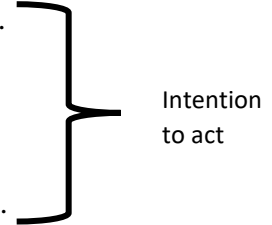

81

82 *(Open-ended question)*

83 Why do you feel this way about environmental problems?

84

85 **Demographic Questions**

86 What is your gender or gender identity?

87 What is your age?

88 What is your **racial identity**?

89 What is the zip code of your hometown?

90 What year are you in school?

91 What is your current or intended major?

92 Are you a first-generation college student? (*neither parent or guardian who you have lived with  
93 has a bachelor's degree*)

94

95

96

97

98

99

100

101

102

103

104

105

106

107

108

109

110

111

112

113

114

115

116 *Table S2.* Factor loadings for three factors emerging from the 22-item survey. Two factors are  
 117 related to beliefs (wildfire and urbanization) and the final factor is related to the intention to act.  
 118 Items 20, 21, and 22 were reverse scored for consistency. Items 9, 15, and 17 were removed from  
 119 the analysis.

120  
 121  
 122  
 123  
 124  
 125  
 126  
 127  
 128  
 129  
 130  
 131  
 132  
 133  
 134  
 135  
 136  
 137  
 138  
 139  
 140  
 141  
 142  
 143  
 144  
 145  
 146  
 147  
 148  
 149  
 150  
 151

| <i>Item</i> | <i>Wildfire beliefs</i> | <i>Urban beliefs</i> | <i>Intention to act</i> |
|-------------|-------------------------|----------------------|-------------------------|
| Item 1      | 0.660                   |                      |                         |
| Item 2      | 0.715                   |                      |                         |
| Item 3      | 0.736                   |                      |                         |
| Item 4      | 0.807                   |                      |                         |
| Item 5      | 0.770                   |                      |                         |
| Item 6      | 0.777                   |                      |                         |
| Item 7      | 0.519                   |                      |                         |
| Item 8      | 0.508                   |                      |                         |
| Item 10     |                         | 0.703                |                         |
| Item 11     |                         | 0.575                |                         |
| Item 12     |                         | 0.758                |                         |
| Item 13     |                         | 0.852                |                         |
| Item 14     |                         | 0.817                |                         |
| Item 16     |                         | 0.456                |                         |
| Item 18     |                         |                      | 0.610                   |
| Item 19     |                         |                      | 0.708                   |
| Item 20     |                         |                      | 0.617                   |
| Item 21     |                         |                      | 0.659                   |
| Item 22     |                         |                      | 0.588                   |

152  
153  
154  
155  
156  
157  
158  
159  
160  
161  
162  
163  
164  
165  
166  
167  
168  
169  
170  
171  
172  
173  
174  
175  
176  
177  
178  
179  
180  
181

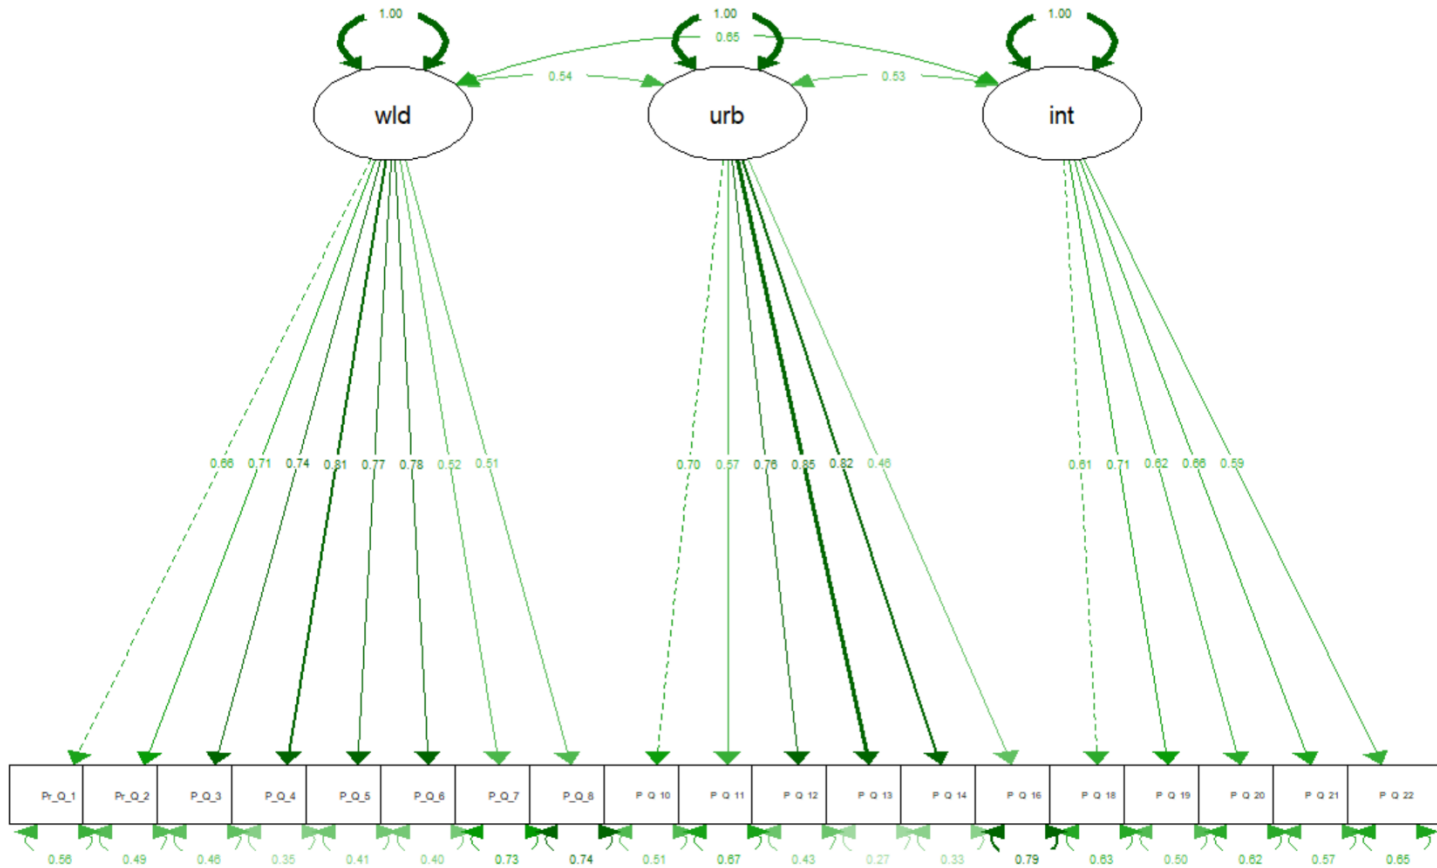

*Figure S1.* Path diagram for the 22-items on the WUAS with the three represented constructs (wld= wildfire beliefs, urb= urbanization beliefs, int= intention to act). Items 9, 15, and 17 were removed due to discrepancies in validity.

182 **Table S3.** Demographics of the respondents by biology major and non-major from the 164  
 183 participants in the matched data set.

184  
 185  
 186  
 187

|                               | <i>Biology</i> | <i>Non-biology major</i> |
|-------------------------------|----------------|--------------------------|
| Male/Female/Undisclosed       | 25/69/1        | 11/58                    |
| Average age                   | 19.54          | 20.41                    |
| <b>Racial identity</b>        |                |                          |
| % <i>African American</i>     | 5%             | 4%                       |
| % <i>American Indian</i>      | 2%             | 0%                       |
| % <i>Asian</i>                | 12%            | 1%                       |
| % <i>Caucasian</i>            | 76%            | 90%                      |
| % <i>Latino/Latina/Latinx</i> | 5%             | 6%                       |
| % First generation            | 77%            | 84%                      |

188  
 189  
 190  
 191  
 192  
 193  
 194  
 195  
 196  
 197  
 198  
 199  
 200  
 201  
 202  
 203  
 204  
 205  
 206  
 207  
 208  
 209  
 210  
 211  
 212  
 213  
 214

215 *Table S4.* Items with highest agreement and disagreement for both majors and non-majors pre-  
 216 and post-intervention.

217  
 218  
 219

Pre-intervention

| <i>Non-major</i>                        |                                                                     | <i>Major</i>                                            |                                                                     |
|-----------------------------------------|---------------------------------------------------------------------|---------------------------------------------------------|---------------------------------------------------------------------|
| <i>Agree</i>                            | <i>Disagree</i>                                                     | <i>Agree</i>                                            | <i>Disagree</i>                                                     |
| 1. "I believe our climate is changing." | 21 "It is a waste of time to work to solve environmental problems." | 18 "I can do my part to make the world a better place," | 21 "It is a waste of time to work to solve environmental problems." |

Post-intervention

| <i>Non-major</i>                                                                    |                                                                                        | <i>Major</i>                                                     |                                                                                        |
|-------------------------------------------------------------------------------------|----------------------------------------------------------------------------------------|------------------------------------------------------------------|----------------------------------------------------------------------------------------|
| <i>Agree</i>                                                                        | <i>Disagree</i>                                                                        | <i>Agree</i>                                                     | <i>Disagree</i>                                                                        |
| 4. "I believe that there is evidence of an increase in global wildfire occurrence." | 20. "I think most of the concerns about environmental problems have been exaggerated." | 6. "Wildfires will impact our environment in the next 10 years." | 20. "I think most of the concerns about environmental problems have been exaggerated." |

220  
 221  
 222  
 223  
 224  
 225  
 226  
 227  
 228  
 229  
 230  
 231  
 232  
 233  
 234  
 235  
 236  
 237  
 238  
 239



240 **VIDEO LINKS**

241

242

243 [Emotion-based intervention video](#)

244

245

246

247 [Fact-based intervention video](#)

248

249

250

251

252

253

254

255

256

257

258

259

260

261

262

263

264

265

266

267

268

269

270

271

272

273

274

275

276
